# Supplementary material
Source: publisher figshare collection journal article supplement (https://aacr.figshare.com/articles/dataset/_/22456004)
Supplement: Supplementary file 1 [file 39907160]

**Figure S1. Evaluation of the procedure used to quantitate the constitutive products derived from irinotecan or IMMU-132.** (A) Reversed-phase HPLC separation of the 4 products of interest, SN-38, SN-38G, and irinotecan, as well as the internal standard, 10-hydroxycamptothecin. (B) Example of standard curve derived for SN-38 showing a linear range from 10 to 10,000 ng/mL.

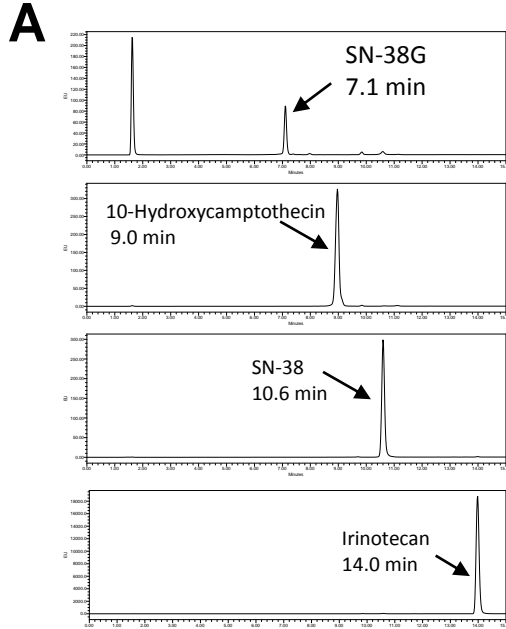

Blank samples of serum, liver, tumor, and feces processed in the same manner as samples for analysis were run to assess if there were background fluorescence peaks co-migrating at these times. Some background subtraction required for serum and feces required.

C: 50 mM  $\text{KH}_2\text{PO}_4$  and 4mM Na-1decanesulfonate in water, pH 3.5  
D: 600 mL buffer C and 400 mL acetonitrile  
Linear gradient, starting with 85:15 C/D to 100% D over 15 min

**B**

| SN-38 Standards (ng/mL) | Mean SN-38/10-OH-CPT ratio |
|-------------------------|----------------------------|
| 10                      | 0.0647                     |
| 50                      | 0.2691                     |
| 100                     | 0.5897                     |
| 500                     | 2.6978                     |
| 1000                    | 5.4443                     |
| 5000                    | 27.8591                    |
| 10000                   | 57.1465                    |

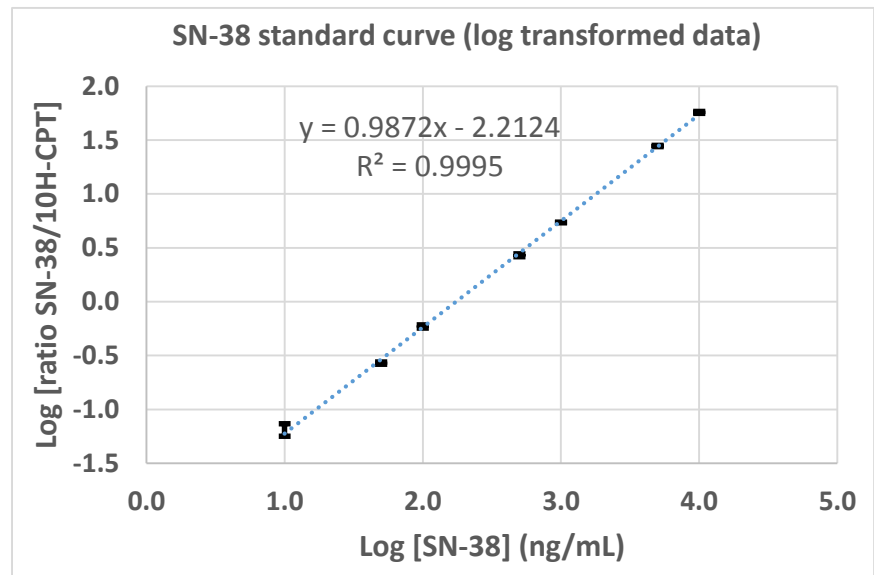

Lower limit of sensitivity for all products = 10 ng/mL

- Serum is diluted 1:2 so minimum sensitivity = 20 ng/mL
- Tissue homogenates are a 11:1 dilution, therefore minimum sensitivity is 110 ng/mL
